# Supplementary material for: Maximizing Engagement in Large-Scale Social Networks
Source: Atypon-hosted journal article supplement (doi:10.1287/ijoo.2022.0024), 2024-07-01
Supplement: ijoo.2022.0024.sm1.pdf [file ijoo.2022.0024.sm1.pdf]

## Appendix A – Examples for Propositions 4, 5, 6, 8

A minimal description of  $P_{3,3}(G)$  for an instance of the problem (see Figure 1) is provided below by employing PORTA.

$$\begin{array}{rcccccccc}
 -x_1 & & & & & & & & \leq 0 \\
 & -x_2 & & & & & & & \leq 0 \\
 & & -x_3 & & & & & & \leq 0 \\
 & & & -x_4 & & & & & \leq 0 \\
 & & & & +x_4 & & & & \leq 0 \\
 & & & & & & & -y_8 & \leq 0 \\
 & & +x_3 & & & & -y_7 & & \leq 0 \\
 & +x_2 & & & & & & -y_6 & \leq 0 \\
 +x_1 & & & & & & -y_5 & & \leq 0 \\
 & +x_2 & +x_4 & -y_1 & & & & & \leq 0 \\
 & +x_2 & +x_4 & & -y_3 & & & & \leq 0 \\
 +x_1 & +x_3 & & -y_2 & & & & & \leq 0 \\
 +x_1 & +x_3 & & & -y_4 & & & & \leq 0 \\
 & +x_2 & +x_4 & & +y_4 & & & & \leq 1 \\
 & +x_2 & +x_4 & +y_2 & & & & & \leq 1 \\
 +x_1 & +x_3 & & +y_3 & & & & & \leq 1 \\
 +x_1 & +x_3 & +y_1 & & & & & & \leq 1 \\
 & +x_2 +x_3 +x_4 & & & +y_5 & & & & \leq 1 \\
 +x_1 & +x_3 +x_4 & & & +y_6 & & & & \leq 1 \\
 +x_1 +x_2 & +x_4 & & & +y_7 & & & & \leq 1 \\
 +x_1 +x_2 +x_3 & & & & +y_8 & & & & \leq 1 \\
 & & & +y_1 +y_2 +y_3 +y_4 +y_5 +y_6 +y_7 +y_8 & & & & & \leq 3
 \end{array}$$

As these inequalities provide a minimal description of the anchored 3-core polytope with a budget of 3 and the polytope is full dimensional, the following observations show the tightness of conditions in Propositions 4–6 and Proposition 8.

- For Proposition 4, inequalities  $x_1 + y_1 \leq 1$ ,  $x_2 + y_2 \leq 1$ ,  $x_3 + y_3 \leq 1$ , or  $x_4 + y_4 \leq 1$  are not present.
- For Proposition 5, inequalities  $y_5 \leq 1$ ,  $y_6 \leq 1$ ,  $y_7 \leq 1$ , or  $y_8 \leq 1$  are not present.
- For Proposition 6, inequalities  $y_1 \geq 0$ ,  $y_2 \geq 0$ ,  $y_3 \geq 0$ , or  $y_4 \geq 0$  are not present.
- For Proposition 8, inequalities  $x_1 \leq x_2 + y_2$ ,  $x_1 \leq x_3 + y_3$ ,  $x_2 \leq x_1 + y_1$ ,  $x_2 \leq x_4 + y_4$ ,  $x_3 \leq x_4 + y_4$ ,  $x_3 \leq x_1 + y_1$ ,  $x_4 \leq x_3 + y_3$  and  $x_4 \leq x_2 + y_2$  are not present.

Thus, we showed that our conditions for Propositions 4–6 and Proposition 8 are minimal.

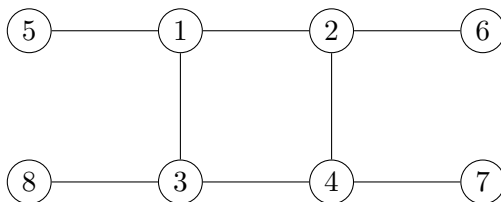

Figure 1 An instance of the maximum anchor  $k$ -core problem with  $k = 3$  and  $b = 3$
